# Supplementary material for: Effects of Methylprednisolone on Ventilator-Free Days in Mechanically Ventilated Patients with Acute Respiratory Distress Syndrome and COVID-19: A Retrospective Study
Source: PubMed Central journal article supplement (PMC7917584; doi:10.3390/jcm10040760), 2021-02-14
Supplement: jcm-10-00760-s001.pdf [file jcm-10-00760-s001.pdf]

**Table S1.** Univariate competing-risks regression analysis.

| <b>Variables</b>                                                          | <b>SHR (95% confidence interval)</b> | <b>p-value</b> |
|---------------------------------------------------------------------------|--------------------------------------|----------------|
| <b>Methylprednisolone treatment, (refer: no)</b>                          | 0.46 (0.25-0.85)                     | <b>0.013</b>   |
| <b>Age, year</b>                                                          | 1.03 (0.99-1.06)                     | <b>0.062</b>   |
| <b>Male, n (%)</b>                                                        | 1.18 (0.47-2.98)                     | 0.73           |
| <b>Body mass index, kg.m<sup>-2</sup></b>                                 | 1.02 (0.97-1.07)                     | 0.51           |
| <b>SOFA</b>                                                               | 1.01 (0.96-1.25)                     | 0.16           |
| <b>SAPS II</b>                                                            | 1.01 (0.99-1.03)                     | 0.24           |
| <b>Patients with comorbidities, (refer: no)</b>                           | 1.19 (0.67-2.08)                     | 0.55           |
| <b>Comorbidities distribution, (refer: no)</b>                            |                                      |                |
| Diabetes mellitus                                                         | 0.79 (0.45-1.39)                     | 0.41           |
| Hypertension                                                              | 1.44 (0.76-2.72)                     | 0.26           |
| Chronic kidney disease                                                    | 2.16 (1.19-3.91)                     | <b>0.011</b>   |
| Chronic artery disease                                                    | 0.93 (0.37-2.34)                     | 0.89           |
| <b>Time from symptoms onset to ICU admission, day</b>                     | 0.97 (0.90-1.04)                     | 0.41           |
| <b>Time from symptoms onset to intubation, day</b>                        | 0.98 (0.91-1.04)                     | 0.48           |
| <b>Time from symptoms onset to Methylprednisolone administration, day</b> | 1.00 (0.92-1.08)                     | 0.99           |
| <b>Vital signs on ICU admission</b>                                       |                                      |                |
| Temperature (max), °C                                                     | 1.23 (0.95-1.73)                     | 0.10           |
| Heart rate, beats.min <sup>-1</sup>                                       | 1.00 (0.99-1.01)                     | 0.27           |
| Respiratory rate, breaths.min <sup>-1</sup>                               | 1.01 (0.98-1.04)                     | 0.50           |
| <b>Laboratory data on ICU admission</b>                                   |                                      |                |
| C-reactive protein, mg.L <sup>-1</sup>                                    | 1.00 (0.99-1.001)                    | 0.31           |
| Leucocytes count, × 10 <sup>9</sup> .l <sup>-1</sup>                      | 0.98 (0.91-1.05)                     | 0.59           |
| Lymphocytes count, × 10 <sup>9</sup> .l <sup>-1</sup>                     | 1.73 (0.58-5.09)                     | 0.32           |
| Platelet count, × 10 <sup>9</sup> .l <sup>-1</sup>                        | 1.00 (0.99-1.002)                    | 0.55           |
| Procalcitonin, ng.mL <sup>-1</sup>                                        | 1.01 (1.00-1.02)                     | <b>0.005</b>   |
| International normalized ratio                                            | 0.84 (0.14-5.18)                     | 0.85           |
| Activated partial thromboplastin time; s                                  | 1.01 (0.98-1.04)                     | 0.42           |
| D-dimer, µg.mL <sup>-1</sup>                                              | 0.86 (0.70-1.06)                     | 0.17           |
| Fibrinogen, g.L <sup>-1</sup>                                             | 1.09 (0.94-1.26)                     | 0.27           |
| Ferritin, µg.L <sup>-1</sup>                                              | 1.00 (0.99-1.00)                     | 0.96           |
| Interleukin 6, ng.L <sup>-1</sup>                                         | 1.00 (0.99-1.00)                     | 0.28           |
| Alanine aminotransferase, IU.mL <sup>-1</sup>                             | 1.00 (0.99-1.01)                     | 0.81           |
| Aspartate aminotransferase, IU.mL <sup>-1</sup>                           | 1.00 (0.99-1.02)                     | 0.23           |
| Total bilirubin, µmol.L <sup>-1</sup>                                     | 0.99 (0.97-1.01)                     | 0.47           |
| Creatinine, µmol.L <sup>-1</sup>                                          | 1.00 (0.99-1.00)                     | <b>0.09</b>    |
| PaO <sub>2</sub> /FiO <sub>2</sub> ratio, mmHg                            | 1.00 (0.99-1.00)                     | 0.19           |
| SaO <sub>2</sub> , %                                                      | 0.97 (0.93-1.00)                     | <b>0.08</b>    |
| PaCO <sub>2</sub> , mmHg                                                  | 1.00 (0.98-1.03)                     | 0.66           |
| Lactate, mmol.L <sup>-1</sup>                                             | 1.38 (0.98-1.93)                     | <b>0.06</b>    |
| <b>Treatments (refer: no)</b>                                             |                                      |                |
| Vasopressor support                                                       | 2.80 (1.46-5.39)                     | <b>0.002</b>   |
| Prone position                                                            | 3.08 (1.60-5.95)                     | <b>0.001</b>   |

|                                                                    |                  |              |
|--------------------------------------------------------------------|------------------|--------------|
| Neuromuscular blocker agents                                       | 2.11 (1.12-3.98) | <b>0.021</b> |
| Renal replacement therapy                                          | 2.12 (0.72-6.27) | 0.17         |
| Tocilizumab                                                        | 1.14 (0.69-1.89) | 0.60         |
| Hydroxychloroquine                                                 | 1.13 (0.64-2.00) | 0.67         |
| Favipiravir                                                        | 0.80 (0.42-1.51) | 0.49         |
| Lopinavir/ritonavir                                                | 1.11 (0.63-1.98) | 0.71         |
| <b>Ventilator parameters</b>                                       |                  |              |
| Tidal volume, mL.kg <sup>-1</sup> IBW                              | 1.07 (0.83-1.37) | 0.61         |
| Plateau pressure, cmH <sub>2</sub> O                               | 1.02 (0.95-1.10) | 0.63         |
| Positive end expiratory pressure, cmH <sub>2</sub> O               | 1.00 (0.83-1.22) | 0.93         |
| Driving pressure, cmH <sub>2</sub> O                               | 1.01 (0.94-1.09) | 0.72         |
| Static respiratory compliance, mL.cmH <sub>2</sub> O <sup>-1</sup> | 0.99 (0.95-1.03) | 0.68         |

SOFA, Sequential Organ Failure Assessment; SAPS, Simplified Acute Physiology Score; PaO<sub>2</sub>, arterial oxygen tension; PaCO<sub>2</sub>, arterial CO<sub>2</sub> tension; FiO<sub>2</sub>, Inspiratory oxygen fraction; SaO<sub>2</sub>, arterial oxygen saturation; IBW, ideal body weight; ICU, intensive care unit; SHR, sub hazards ratio.

p ≤ 0.05 was considered statistically significant.
